# Supplementary material for: Dependence of the nascent vibrational distribution of NO(v) on the photolysis wavelength of NO2 in the range λ = 266–327 nm measured by time-resolved Fourier transform infrared emission
Source: Royal Society of Chemistry journal article supplement (doi:10.1039/b710594k), 2007-01-01

### Surprisal Plots – Supplementary Data

Surprisal plots for the nascent distribution of NO following photolysis of NO<sub>2</sub> at various wavelengths as determined in this work and previously. Data points that are circled are ignored in the analysis

#### 248 nm

Slanger *et al.*<sup>4</sup>

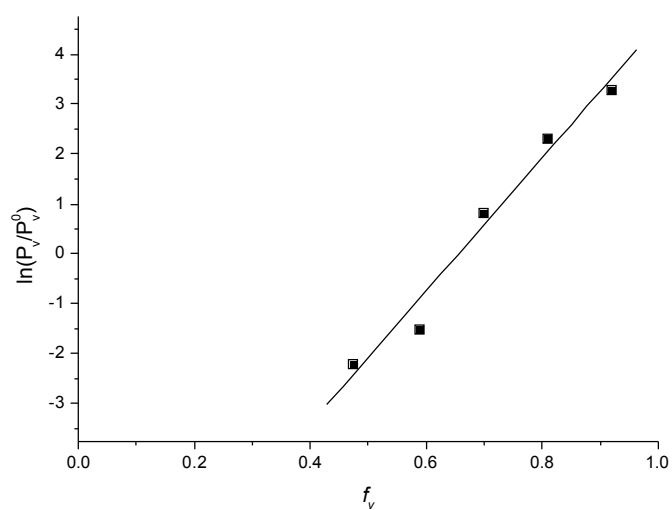

McFarlane *et al.*<sup>8</sup>

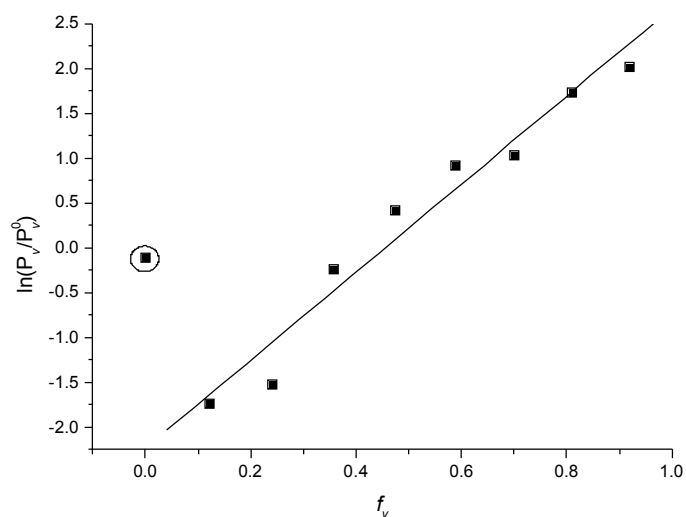

Morrell *et al.*<sup>9</sup>

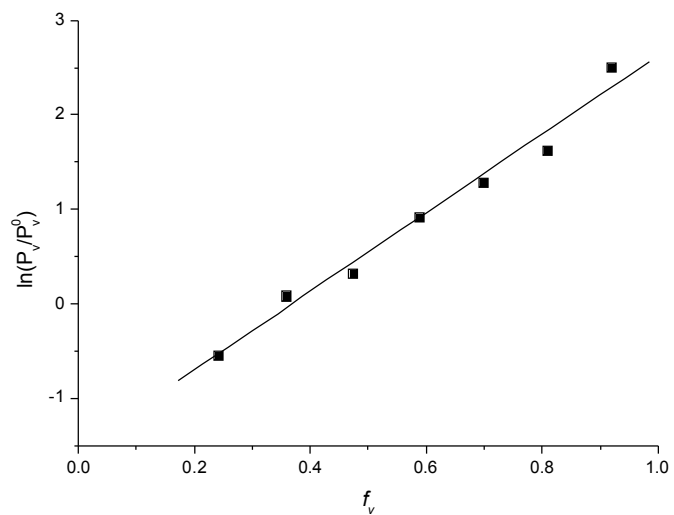

**266 nm**

This work

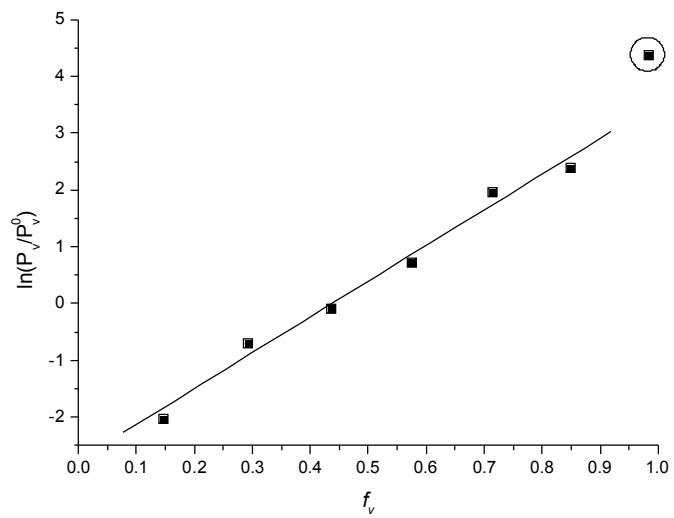

### 282 nm

This work

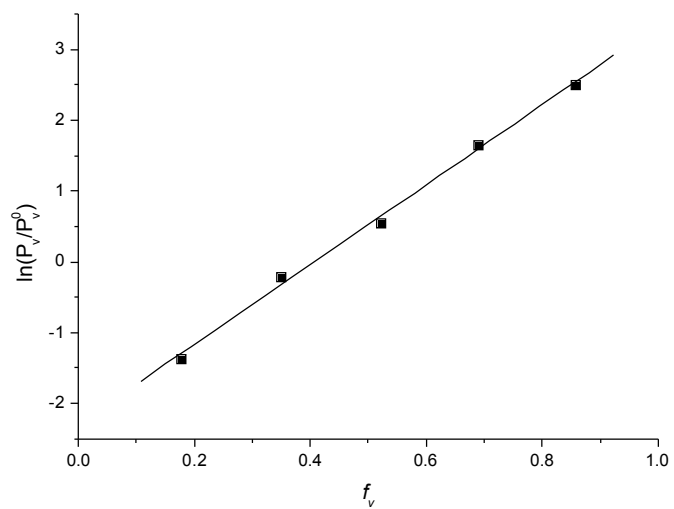

### 295 nm

This work

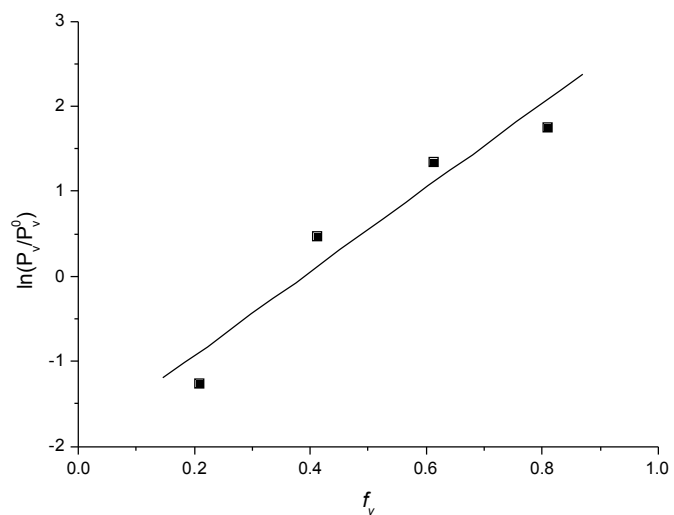

### 308 nm

This work

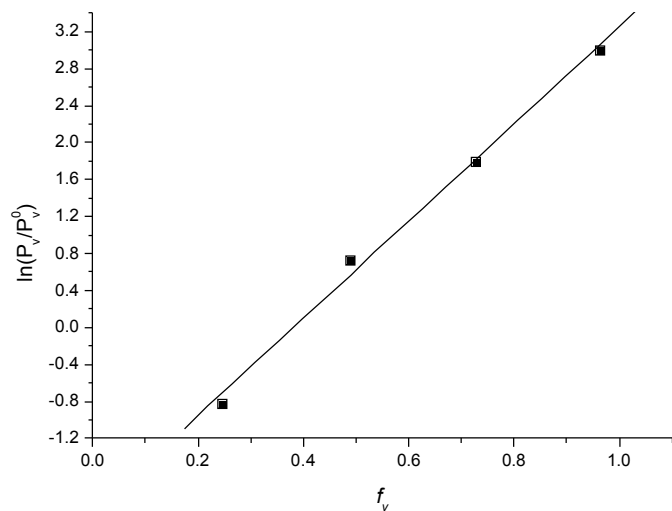

Brouard *et al.*<sup>12</sup> using Zacharias *et al.*<sup>7</sup> rotational populations

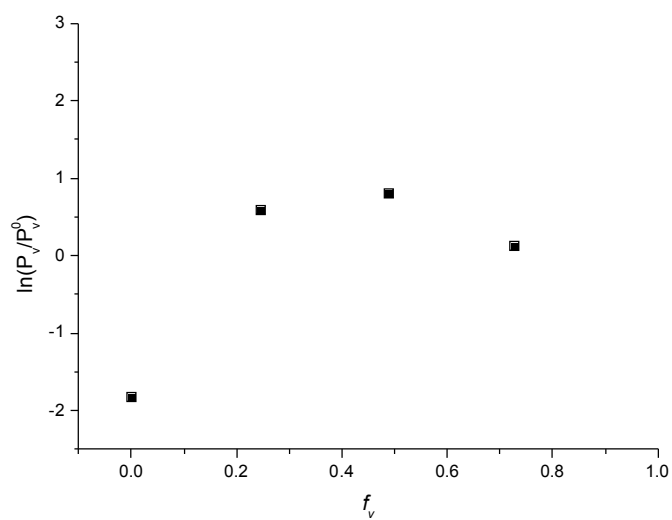

Brouard *et al.*<sup>12</sup> using Knepp *et al.*<sup>10</sup> rotational populations

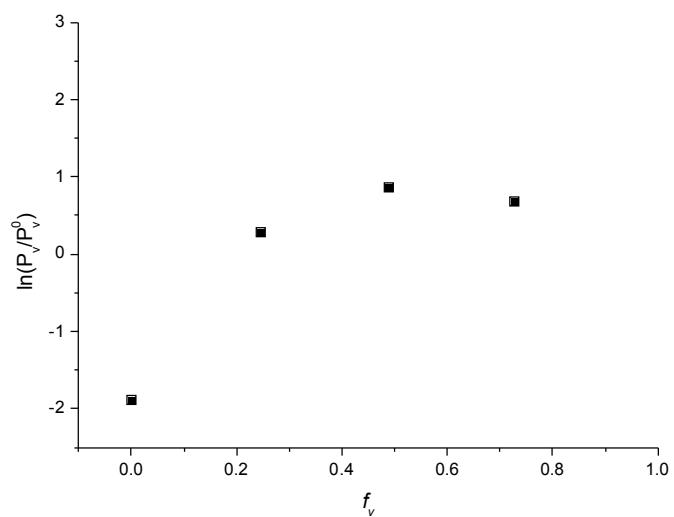

Zacharias *et al.*<sup>7</sup>

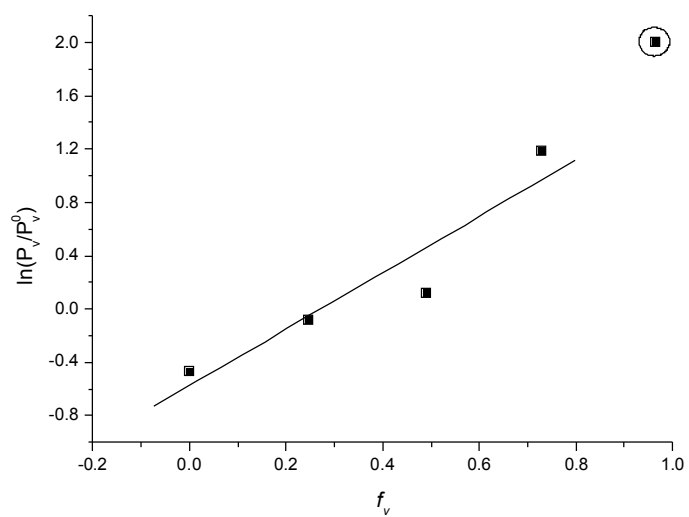

Doughty *et al.*<sup>11</sup>

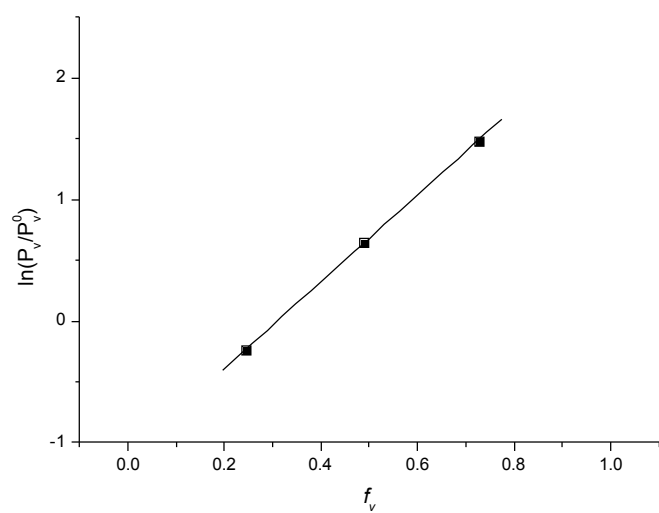

**309 nm**

Knepp *et al.*<sup>10</sup>

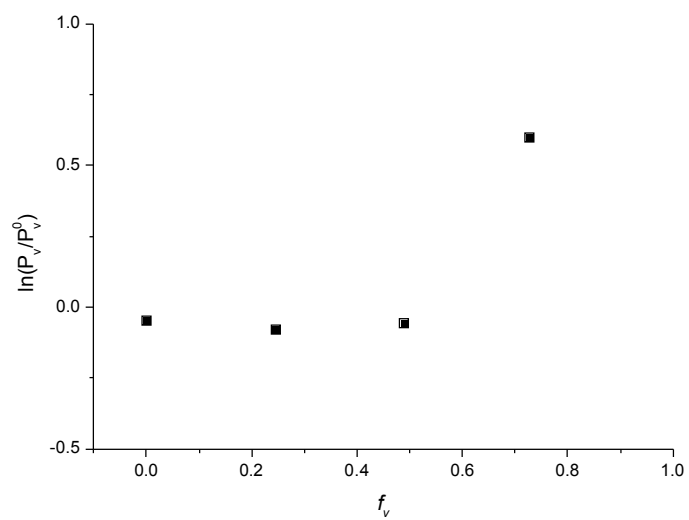

### 320 nm

This work

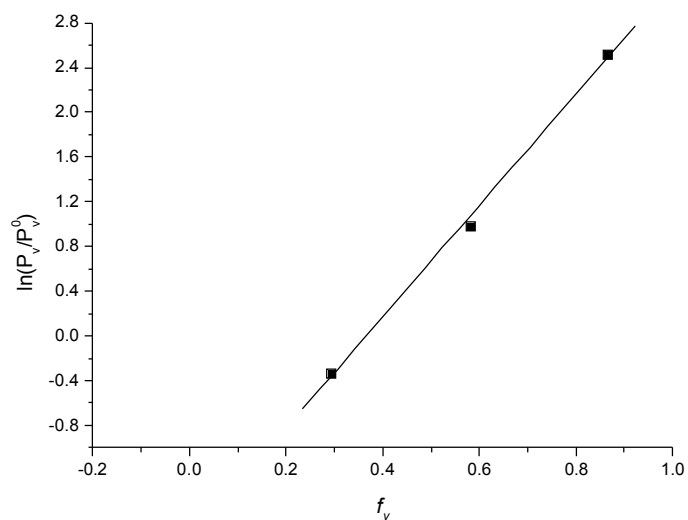

### 327 nm

This work

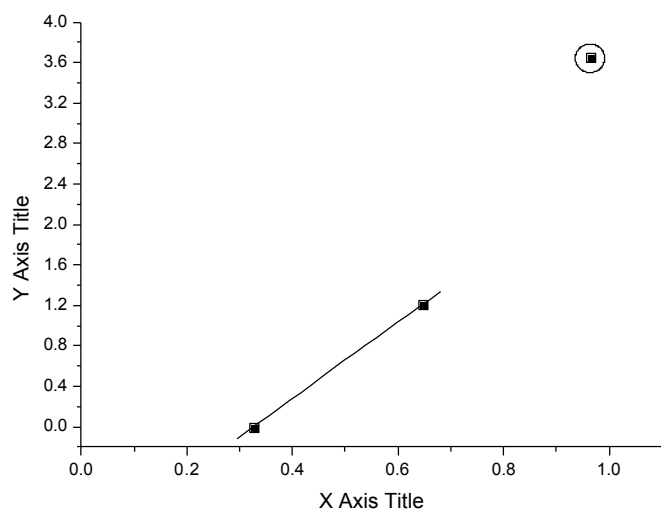

**337 nm**

Zacharias *et al.*<sup>5</sup>

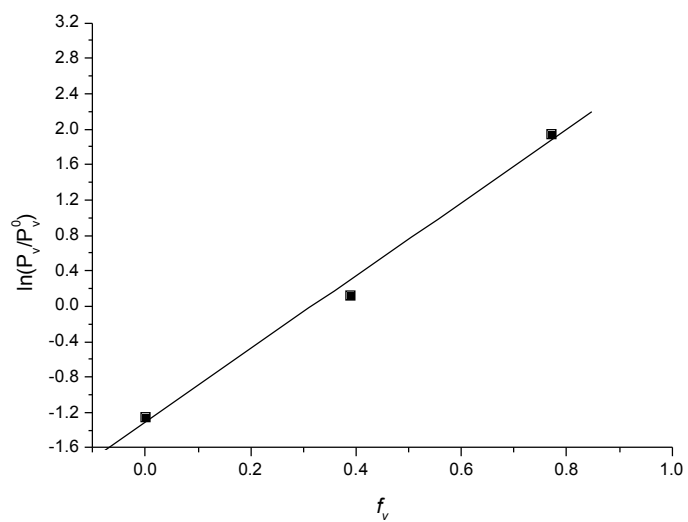

Supplement: b710594k.pdf [file b710594k.pdf]
